# Supplementary material for: Nasal Polyposis Quality of Life (NPQ): Development and Validation of the First Specific Quality of Life Questionnaire for Chronic Rhinosinusitis with Nasal Polyps
Source: MDPI journal article supplement (doi:10.3390/healthcare10020253), 2022-01-28
Supplement: s1 [file s1]

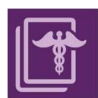

**Table S1. Item generation: results of items generation phase**

1. Pain
2. Being nervous
3. Having to do clinical examinations
4. Having disturbed sleep
5. Swelling
6. Being worried about my health
7. Feeling embarassed due to my physical appearance
8. Being limited in my life activities
9. Lack of symptoms control
10. Being bothered to take medications
11. Being weary
12. Sleep problems
13. Being upset for my health condition
14. Feeling uncomfortable in social relationship
15. Smell disorders
16. Having to spend money
17. Dry mouth
18. Restricted in sport activities
19. Bad breath
20. Restricted in physical activities of daily life
21. Wake up during night to drink
22. Having a bad taste in the mouth
23. Difficulty enjoyng food and wine
24. Feeling irritable
25. Difficulty concentrating
26. Feeling tired
27. Loss of smell
28. Anxiety
29. Feeling uncomfortable with other people
30. Feeling embarassed due to the symptoms
31. Kneaded mouth
32. Being worried
33. Feeling embarassed in social life
34. Dark circles
35. Swollen face
36. Having to do CT scans
37. Hearing problems
38. Being bothered by medication side effects
39. Being bothered for the possibility of surgery
40. Being annoyed by frequent medical control
41. Feeling stressed

- 42. Feeling to have poor disease control
- 43. Nasal voice
- 44. Snoring
- 45. Having to do invasive clinical examinations
- 46. Having difficulties in intimate life
- 47. Being worried by long term drug efficacy
- 48. Kissing difficulty
- 49. Having difficulties in controlling symptoms
- 50. Fear that the problem will recur
- 51. Afraid not to notice to stink (when you sweat)
- 52. Facial pain
- 53. Headache
- 54. Make less than you would like

### The validated Italian version of the questionnaire

**Il presente questionario ha lo scopo di valutare l'impatto della rinosinusite cronica con poliposi nasale sulla vita quotidiana.**

**Indichi con *una* crocetta quanto è stato disturbato dalla presenza di ognuno dei seguenti problemi nel corso delle ultime 2 settimane a causa della rinosinusite cronica con poliposi nasale**

#### **1) Disturbi del sonno**

|            |        |            |       |            |
|------------|--------|------------|-------|------------|
| Per niente | Un po' | Abbastanza | Molto | Moltissimo |
|------------|--------|------------|-------|------------|

#### **2) Avere la gola asciutta**

|            |        |            |       |            |
|------------|--------|------------|-------|------------|
| Per niente | Un po' | Abbastanza | Molto | Moltissimo |
|------------|--------|------------|-------|------------|

#### **3) Essere limitati nello svolgere attività sportive**

|            |        |            |       |            |
|------------|--------|------------|-------|------------|
| Per niente | Un po' | Abbastanza | Molto | Moltissimo |
|------------|--------|------------|-------|------------|

#### **4) Avere un alito sgradevole**

|                                                                                                      |        |            |       |            |
|------------------------------------------------------------------------------------------------------|--------|------------|-------|------------|
| Per niente                                                                                           | Un po' | Abbastanza | Molto | Moltissimo |
| <b>5) Fare fatica a gustare il cibo e il vino</b>                                                    |        |            |       |            |
| Per niente                                                                                           | Un po' | Abbastanza | Molto | Moltissimo |
| <b>6) Sentirsi irritabile</b>                                                                        |        |            |       |            |
| Per niente                                                                                           | Un po' | Abbastanza | Molto | Moltissimo |
| <b>7) Essere preoccupati per gli effetti collaterali dei farmaci</b>                                 |        |            |       |            |
| Per niente                                                                                           | Un po' | Abbastanza | Molto | Moltissimo |
| <b>8) Sentirsi in imbarazzo in situazioni sociali</b>                                                |        |            |       |            |
| Per niente                                                                                           | Un po' | Abbastanza | Molto | Moltissimo |
| <b>9) Avere una voce nasale</b>                                                                      |        |            |       |            |
| Per niente                                                                                           | Un po' | Abbastanza | Molto | Moltissimo |
| <b>10) Essere preoccupato per questa patologia</b>                                                   |        |            |       |            |
| Per niente                                                                                           | Un po' | Abbastanza | Molto | Moltissimo |
| <b>11) Sentire di avere poco controllo sulla malattia</b>                                            |        |            |       |            |
| Per niente                                                                                           | Un po' | Abbastanza | Molto | Moltissimo |
| <b>12) Temere di non accorgersi di avere un odore sgradevole addosso (ad esempio quando si suda)</b> |        |            |       |            |
| Per niente                                                                                           | Un po' | Abbastanza | Molto | Moltissimo |

**13) Avere mal di testa**

|            |        |            |       |            |
|------------|--------|------------|-------|------------|
| Per niente | Un po' | Abbastanza | Molto | Moltissimo |
|------------|--------|------------|-------|------------|

**14) Temere che il problema si ripresenterà**

|            |        |            |       |            |
|------------|--------|------------|-------|------------|
| Per niente | Un po' | Abbastanza | Molto | Moltissimo |
|------------|--------|------------|-------|------------|

**15) Essere preoccupato per la possibilità di un intervento chirurgico**

|            |        |            |       |            |
|------------|--------|------------|-------|------------|
| Per niente | Un po' | Abbastanza | Molto | Moltissimo |
|------------|--------|------------|-------|------------|

**16) Sentirsi stressati**

|            |        |            |       |            |
|------------|--------|------------|-------|------------|
| Per niente | Un po' | Abbastanza | Molto | Moltissimo |
|------------|--------|------------|-------|------------|

**17) Russare di notte**

|            |        |            |       |            |
|------------|--------|------------|-------|------------|
| Per niente | Un po' | Abbastanza | Molto | Moltissimo |
|------------|--------|------------|-------|------------|

**18) Avere difficoltà a concentrarsi**

|            |        |            |       |            |
|------------|--------|------------|-------|------------|
| Per niente | Un po' | Abbastanza | Molto | Moltissimo |
|------------|--------|------------|-------|------------|

**19) Fare fatica a sentire gli odori**

|            |        |            |       |            |
|------------|--------|------------|-------|------------|
| Per niente | Un po' | Abbastanza | Molto | Moltissimo |
|------------|--------|------------|-------|------------|

**20) Sentirsi in imbarazzo per i sintomi**

|            |        |            |       |            |
|------------|--------|------------|-------|------------|
| Per niente | Un po' | Abbastanza | Molto | Moltissimo |
|------------|--------|------------|-------|------------|

**21) Avere un cattivo sapore in bocca**

|            |        |            |       |            |
|------------|--------|------------|-------|------------|
| Per niente | Un po' | Abbastanza | Molto | Moltissimo |
|------------|--------|------------|-------|------------|

**22) Sentirsi la bocca impastata**

|            |        |            |       |            |
|------------|--------|------------|-------|------------|
| Per niente | Un po' | Abbastanza | Molto | Moltissimo |
|------------|--------|------------|-------|------------|

**23) Sentirsi stanco**

|            |        |            |       |            |
|------------|--------|------------|-------|------------|
| Per niente | Un po' | Abbastanza | Molto | Moltissimo |
|------------|--------|------------|-------|------------|

**24) Essere preoccupato che i farmaci a lungo andare siano meno efficaci**

|            |        |            |       |            |
|------------|--------|------------|-------|------------|
| Per niente | Un po' | Abbastanza | Molto | Moltissimo |
|------------|--------|------------|-------|------------|

**25) Sentirsi a disagio con le altre persone**

|            |        |            |       |            |
|------------|--------|------------|-------|------------|
| Per niente | Un po' | Abbastanza | Molto | Moltissimo |
|------------|--------|------------|-------|------------|

**26) Fare fatica a controllare i sintomi**

|            |        |            |       |            |
|------------|--------|------------|-------|------------|
| Per niente | Un po' | Abbastanza | Molto | Moltissimo |
|------------|--------|------------|-------|------------|

**27) Rendere meno di quanto vorrebbe**

Per niente

Un po'

Abbastanza

Molto

Moltissimo
